# Supplementary material for: Unveiling a novel transient druggable pocket in BACE-1 through molecular simulations: Conformational analysis and binding mode of multisite inhibitors
Source: PubMed Central journal article supplement (PMC5432175; doi:10.1371/journal.pone.0177683), 2017-05-15
Supplement: pone.0177683.s007.pdf [file pone.0177683.s007.pdf]

|      | MD                         | REPLICAS | TIME (ns)   | ANALYSIS                                                                                                                                                                                                                                                                                                                                                                                 |
|------|----------------------------|----------|-------------|------------------------------------------------------------------------------------------------------------------------------------------------------------------------------------------------------------------------------------------------------------------------------------------------------------------------------------------------------------------------------------------|
| APO  | Loop-IN<br>(PDB ID: 1sgz)  | 100      | (100) X 100 | <b>Principal Component Analysis</b><br>1st: 23%, 2nd: 13%, 3d: 8%<br><b>Clustering</b><br>Loop-IN: 13 clusters, with pocket sizes from 40 to 125 Å <sup>3</sup><br>Loop-OUT: 50 clusters; pocket sizes from 490 to 1,250 Å <sup>3</sup><br><b>Druggability</b><br>Cluster 13 (population of 1.5%): 0,35 (catalytic site), 0.17 (secondary site)<br>Cluster 21 (population of 1.0%): 0.70 |
|      | Loop-OUT<br>(PDB ID: 2p4j) | 100      | (100) X 100 |                                                                                                                                                                                                                                                                                                                                                                                          |
| HOLO | (+)-1<br>[conformer A]     | 3        | (3) X 50    | <b>Binding mode</b><br><br>Catalytic site:<br>Asp32, Asp228<br>Leu30, Tyr71, Phe108, Trp115, and Ile118,<br>Tyr198, Ile226<br><br>Secondary site:<br>Arg307-Glu339<br>Lys 9, Ser10, Glu310<br>Phe159, Leu161, Leu 167, Pro308, Val309                                                                                                                                                    |
|      | (-)-1<br>[conformer A]     | 3        | (3) X 50    |                                                                                                                                                                                                                                                                                                                                                                                          |
|      | 3<br>[conformer A]         | 3        | (3) X 50    |                                                                                                                                                                                                                                                                                                                                                                                          |
|      | (+)-1<br>[conformer B]     | 3        | (3) X 50    |                                                                                                                                                                                                                                                                                                                                                                                          |
|      | (-)-1<br>[conformer B]     | 3        | (3) X 50    |                                                                                                                                                                                                                                                                                                                                                                                          |
|      | 3<br>[conformer B]         | 3        | (3) X 50    |                                                                                                                                                                                                                                                                                                                                                                                          |
